# Supplementary material for: Assessing Liver Fibrosis Using the FIB4 Index in the Community Setting
Source: MDPI journal article supplement (doi:10.3390/diagnostics11122236), 2021-11-29
Supplement: s1 [file s1]

## Supplementary Materials

**Table S1.** Primary Care Protocols (PCPs) distribution of FIB4 studies performed.

| PCPs                                                    | Total  | FIB4  | %FIB4 | FIB4     | %FIB4    | FIB4  | %FIB4 | FIB4          | %FIB4         | FIB4          | %FIB4         | FIB4   | %FIB4 |
|---------------------------------------------------------|--------|-------|-------|----------|----------|-------|-------|---------------|---------------|---------------|---------------|--------|-------|
|                                                         | FIB4   | <1.3  | <1.3  | 1.3-3.25 | 1.3-3.25 | ≥3.25 | ≥3.25 | requeste<br>d | requeste<br>d | requeste<br>d | requeste<br>d | added  | added |
| PCP01-Arterial<br>hypertension                          | 5,392  | 3,093 | 57.4  | 2,124    | 39.4     | 97    | 1.8   | 776           | 14.4          | 15            | 1.9           | 4,616  | 85.6  |
| PCP02-<br>Hypercholesterolemia:<br>primary prevention   | 138    | 87    | 63.0  | 46       | 33.3     | 4     | 2.9   | 42            | 30.4          | 2             | 4.8           | 96     | 69.6  |
| PCP03-<br>Hypercholesterolemia:<br>follow-up/prevention | 11,843 | 7,206 | 60.8  | 4,308    | 36.4     | 165   | 1.4   | 1,164         | 9.8           | 33            | 2.8           | 10,679 | 90.2  |
| PCP04- Diabetes mellitus:<br>initial test/follow-up     | 1,198  | 691   | 57.7  | 453      | 37.8     | 27    | 2.3   | 182           | 15.2          | 5             | 2.7           | 1016   | 84.8  |
| PCP05-Diabetes mellitus:                                | 1,551  | 911   | 58.7  | 581      | 37.5     | 28    | 1.8   | 156           | 10.1          | 6             | 3.8           | 1,395  | 89.9  |

|                           |       |     |       |     |      |    |     |     |      |   |     |       |       |    |     |
|---------------------------|-------|-----|-------|-----|------|----|-----|-----|------|---|-----|-------|-------|----|-----|
| annual follow-up          |       |     |       |     |      |    |     |     |      |   |     |       |       |    |     |
| PCP06-Diabetic            | 1,356 | 793 | 58.5  | 507 | 37.4 | 31 | 2.3 | 195 | 14.4 | 8 | 4.1 | 1,161 | 85.6  | 23 | 2.0 |
| nephropathy screening     |       |     |       |     |      |    |     |     |      |   |     |       |       |    |     |
| PCP07-Hormonal            | 6     | 6   | 100.0 | 0   | 0.0  | 0  | 0.0 | 1   | 16.7 | 0 | 0.0 | 5     | 83.3  | 0  | 0.0 |
| contraception             |       |     |       |     |      |    |     |     |      |   |     |       |       |    |     |
| PCP08-First trimester     | 1     | 1   | 100.0 | 0   | 0.0  | 0  | 0.0 | 0   | 0.0  | 0 | 0.0 | 1     | 100.0 | 0  | 0.0 |
| pregnancy (33-36 weeks)   |       |     |       |     |      |    |     |     |      |   |     |       |       |    |     |
| PCP10- Third trimester    | 1     | 1   | 100.0 | 0   | 0.0  | 0  | 0.0 | 0   | 0.0  | 0 | 0.0 | 1     | 100.0 | 0  | 0.0 |
| pregnancy (<13 weeks)     |       |     |       |     |      |    |     |     |      |   |     |       |       |    |     |
| PCP11-Initial study of    | 464   | 286 | 61.6  | 164 | 35.3 | 10 | 2.2 | 134 | 28.9 | 2 | 1.5 | 330   | 71.1  | 8  | 2.4 |
| anemia                    |       |     |       |     |      |    |     |     |      |   |     |       |       |    |     |
| PCP12-Iron deficiency     |       |     |       |     |      |    |     |     |      |   |     |       |       |    |     |
| anemia follow-up (4       | 83    | 61  | 73.5  | 20  | 24.1 | 1  | 1.2 | 20  | 24.1 | 0 | 0.0 | 63    | 75.9  | 1  | 1.6 |
| months)                   |       |     |       |     |      |    |     |     |      |   |     |       |       |    |     |
| PCP13-First iron          |       |     |       |     |      |    |     |     |      |   |     |       |       |    |     |
| deficiency anemia follow- | 62    | 47  | 75.8  | 12  | 19.4 | 2  | 3.2 | 14  | 22.6 | 0 | 0.0 | 48    | 77.4  | 2  | 4.2 |
| up (4-6 weeks)            |       |     |       |     |      |    |     |     |      |   |     |       |       |    |     |
| PCP14-Arthritis           | 1,012 | 670 | 66.2  | 316 | 31.2 | 13 | 1.3 | 235 | 23.2 | 4 | 1.7 | 777   | 76.8  | 9  | 1.2 |
| PCP15-Presurgery          | 229   | 133 | 58.1  | 84  | 36.7 | 8  | 3.5 | 42  | 18.3 | 2 | 4.8 | 187   | 81.7  | 6  | 3.2 |

|                                             |       |       |      |       |      |     |     |       |       |    |     |       |      |     |     |
|---------------------------------------------|-------|-------|------|-------|------|-----|-----|-------|-------|----|-----|-------|------|-----|-----|
| PCP16-Hepatic basic study                   | 3,192 | 1,990 | 62.3 | 1,107 | 34.7 | 51  | 1.3 | 239   | 7.5   | 7  | 2.9 | 2,953 | 92.5 | 44  | 1.5 |
| PCP17-Acute viral hepatitis                 | 28    | 22    | 78.6 | 5     | 17.9 | 1   | 3.6 | 20    | 71.4  | 1  | 5.0 | 8     | 28.6 | 0   | 0.0 |
| PCP18-Acute hepatitis follow-up             | 515   | 313   | 60.8 | 181   | 35.1 | 13  | 2.5 | 515   | 100.0 | 13 | 2.5 | 0     | 0.0  | 0   | 0.0 |
| PCP19-Chronic liver disease: initial study  | 1,255 | 776   | 61.8 | 418   | 33.3 | 30  | 2.4 | 1,255 | 100.0 | 30 | 2.4 | 0     | 0.0  | 0   | 0.0 |
| PCP20-Tyroid function: initial study        | 4,398 | 2,878 | 65.4 | 1,421 | 32.3 | 58  | 1.3 | 618   | 14.1  | 9  | 1.5 | 3,780 | 85.9 | 46  | 1.3 |
| PCP21-Hypothyroidism: follow-up             | 991   | 581   | 58.6 | 388   | 39.2 | 7   | 0.7 | 125   | 12.6  | 2  | 1.6 | 866   | 87.4 | 5   | 0.6 |
| PCP22-Secondary amenorrhea                  | 70    | 65    | 92.9 | 4     | 5.7  | 0   | 0.0 | 13    | 18.6  | 0  | 0.0 | 57    | 81.4 | 0   | 0.0 |
| PCP23-Suspected menopause                   | 73    | 62    | 84.9 | 11    | 15.1 | 0   | 0.0 | 10    | 13.7  | 0  | 0.0 | 63    | 86.3 | 0   | 0.0 |
| PCP24-Basic health study                    | 9,310 | 5,824 | 62.6 | 3,204 | 34.4 | 144 | 1.5 | 1,271 | 13.7  | 0  | 0.0 | 8,039 | 86.3 | 109 | 1.4 |
| PCP25-Urinary infection diagnosis           | 1,070 | 646   | 60.4 | 390   | 36.4 | 16  | 1.5 | 156   | 14.6  | 2  | 1.3 | 914   | 85.4 | 14  | 1.5 |
| PCP26-Urinary infection post-treatment test | 168   | 104   | 61.9 | 60    | 35.7 | 0   | 0.0 | 23    | 13.7  | 0  | 0.0 | 145   | 86.3 | 0   | 0.0 |

|                                  |     |     |      |     |       |    |     |    |       |   |     |     |       |   |     |
|----------------------------------|-----|-----|------|-----|-------|----|-----|----|-------|---|-----|-----|-------|---|-----|
| <b>PCP27-Asymptomatic</b>        |     |     |      |     |       |    |     |    |       |   |     |     |       |   |     |
| <b>bacteriuria in pregnant</b>   | 1   | 0   | 0.0  | 1   | 100.0 | 0  | 0.0 | 1  | 100.0 | 0 | 0.0 | 0   | 0.0   | 0 | 0.0 |
| <b>PCP29-Probed patient</b>      |     |     |      |     |       |    |     |    |       |   |     |     |       |   |     |
| <b>urine</b>                     | 1   | 0   | 0.0  | 1   | 100.0 | 0  | 0.0 | 0  | 0.0   | 0 | 0.0 | 1   | 100.0 | 0 | 0.0 |
| <b>PCP30-B12 deficiency</b>      |     |     |      |     |       |    |     |    |       |   |     |     |       |   |     |
| <b>anemia: follow-up (6</b>      | 61  | 39  | 63.9 | 16  | 26.2  | 0  | 0.0 | 2  | 3.3   | 0 | 0.0 | 59  | 96.7  | 0 | 0.0 |
| <b>months)</b>                   |     |     |      |     |       |    |     |    |       |   |     |     |       |   |     |
| <b>PCP31-Folates deficiency</b>  |     |     |      |     |       |    |     |    |       |   |     |     |       |   |     |
| <b>anemia: follow-up (6</b>      | 57  | 36  | 63.2 | 17  | 29.9  | 0  | 0.0 | 1  | 1.8   | 0 | 0.0 | 56  | 98.2  | 0 | 0.0 |
| <b>months)</b>                   |     |     |      |     |       |    |     |    |       |   |     |     |       |   |     |
| <b>PCP32-Diabetes mellitus:</b>  |     |     |      |     |       |    |     |    |       |   |     |     |       |   |     |
| <b>screening</b>                 | 225 | 144 | 64.0 | 77  | 34.2  | 2  | 0.9 | 39 | 17.3  | 0 | 0.0 | 186 | 82.7  | 2 | 1.1 |
| <b>PCP33- Diabetes mellitus:</b> |     |     |      |     |       |    |     |    |       |   |     |     |       |   |     |
| <b>diagnosis</b>                 | 599 | 359 | 59.9 | 225 | 37.6  | 11 | 1.8 | 86 | 14.4  | 2 | 2.3 | 513 | 85.6  | 9 | 1.8 |
| <b>PCP34-Subclinic</b>           |     |     |      |     |       |    |     |    |       |   |     |     |       |   |     |
| <b>hypothyroidism</b>            | 172 | 100 | 58.1 | 68  | 39.5  | 3  | 1.7 | 67 | 39.0  | 1 | 1.5 | 105 | 61.0  | 2 | 1.9 |
| <b>PCP35-Tyroid:</b>             |     |     |      |     |       |    |     |    |       |   |     |     |       |   |     |
| <b>start/modification of</b>     | 180 | 109 | 60.6 | 63  | 35.0  | 3  | 1.7 | 32 | 17.8  | 0 | 0.0 | 148 | 82.2  | 3 | 2.0 |
| <b>treatment</b>                 |     |     |      |     |       |    |     |    |       |   |     |     |       |   |     |
| <b>PCP36-Hypertyhyroidism:</b>   | 338 | 218 | 64.5 | 111 | 32.8  | 4  | 1.2 | 60 | 17.8  | 2 | 3.3 | 278 | 82.2  | 2 | 0.7 |

|                                                     |        |        |      |        |      |     |     |      |       |     |     |        |       |     |     |
|-----------------------------------------------------|--------|--------|------|--------|------|-----|-----|------|-------|-----|-----|--------|-------|-----|-----|
| follow-up                                           |        |        |      |        |      |     |     |      |       |     |     |        |       |     |     |
| PCP37-Folates deficiency<br>anemia: first follow-up | 8      | 5      | 62.5 | 3      | 37.5 | 0   | 0.0 | 2    | 25.0  | 0   | 0.0 | 6      | 75.0  | 0   | 0.0 |
| PCP38-B12 deficiency<br>anemia: first follow-up     | 10     | 7      | 70.0 | 3      | 30.0 | 0   | 0.0 | 1    | 10.0  | 0   | 0.0 | 9      | 90.0  | 0   | 0.0 |
| PCP39-Anemia follow-up<br>in chronic processes      | 7      | 6      | 85.7 | 1      | 14.3 | 0   | 0.0 | 5    | 71.4  | 0   | 0.0 | 2      | 28.6  | 0   | 0.0 |
| PCP40-Iron overload<br>confirmation                 | 87     | 60     | 69.0 | 24     | 27.6 | 3   | 3.4 | 65   | 74.7  | 3   | 4.6 | 22     | 25.3  | 0   | 0.0 |
| Total                                               | 46,152 | 28,330 | 61.4 | 16,414 | 35.6 | 732 | 1.3 | 7567 | 16.40 | 184 | 2.4 | 38,585 | 83.30 | 548 | 1.4 |

In the PCPs related to diabetic pathology (D) (PCP04, 05, 06, 32 and 33) 4929 FIB4 studies were performed. Just 13% of all D studies FIB4 was requested, with a 3.2% FIB4  $\geq 3.25$  and 1.8% FIB4  $\geq 3.25$  among FIB4 studies added.

In the PCPs related to liver pathology (LP) (PCP16, 17, 18, 19 and 40) 5077 FIB4 studies were performed. A 41% of all LP studies FIB4 was requested, with a 2.6% FIB4  $\geq 3.25$  and 1.8% FIB4  $\geq 3.25$  among FIB4 studies added.

In the PCPs related to hydroxycholesterolemia (HC) (PCP02 and 03) 11,981 FIB4 studies were performed. Just a 10% of all HC studies FIB4 was requested, with 2.9% a FIB4  $\geq 3.25$  and 1.2% FIB4  $\geq 3.25$  among FIB4 studies added.

In the PCP01, related to arterial hypertension (AH) 5392 FIB4 studies were performed. Just a 14% of all AH studies FIB4 was requested, with a 1.9% with  $\text{FIB4} \geq 3.25$  and 1.8%  $\text{FIB4} \geq 3.25$  among FIB4 studies added.

In the PCPs related to Thyroid pathology (TP) (PCP21, 34, 35 and 36) 6079 FIB4 studies were performed. Just a 15% of all TP studies FIB4 was requested, with a 1.6% with  $\text{FIB4} \geq 3.25$  and 1.2%  $\text{FIB4} \geq 3.25$  among FIB4 studies added.

In the PCPs related to Anemia studies (AS) (PCP11, 12, 13, 30, 31, 37, 38 and 39) 745 FIB4 studies were performed. In the 23% of all AS studies FIB4 was requested, in which 1.1%  $\text{FIB4} \geq 3.25$  and 1.9%  $\text{FIB4} \geq 3.25$  among FIB4 studies added.

Finally, in the PCP24, which is a Basic Study of Health (BH), frequently requested as starting study in analytical control of patients, 9310 FIB4 studies were performed. Just a 14% of all BH studies FIB4 was requested with a 2.8%  $\text{FIB4} \geq 3.25$  and 1.4%  $\text{FIB4} \geq 3.25$  among FIB4 studies added.

**Table S2.** Primary assistance protocols (PCPs) combinations requested in more than 100 patients.

| PCPs             | n    |
|------------------|------|
| 3                | 1798 |
| 3; 24            | 968  |
| 24               | 756  |
| 1; 3; 24         | 549  |
| 3; 20            | 438  |
| 3; 20; 24        | 426  |
| 1; 3             | 425  |
| 3; 16; 24        | 267  |
| 1; 3; 20; 24     | 266  |
| 3; 16; 20; 24    | 211  |
| 3; 25            | 195  |
| 1; 3; 16; 24     | 194  |
| 1; 3; 16; 20; 24 | 190  |
| 20; 24           | 139  |
| 19               | 134  |
| 3; 21            | 130  |

|           |     |
|-----------|-----|
| 16; 24    | 116 |
| 3; 21; 24 | 109 |
| 20        | 107 |
| 25        | 101 |

Among all the 1,871 PCPs combinations, just 20 of them were observed in more than 100 patients, accounting for a total of 7519 patients. Taking this representative subset of patients, in 6166 (82%) of them PCP03 (hypercholesterolemia) was requested. In 3180 of these studies PCP03 was requested together with PCP24 (Basic Health). In 2591 patients PCP01 (Arterial Hypertension) was requested, most of them (2341) joined to PCP03. In fact, in 13,508 (74.6%) of the entire 18,102 patient's cohort (40 to 75 years), PCP01 and/or PCP03 were requested, both clinical situations included in MetSd criteria.
